# Supplementary material for: Bioinspired design of DNA in aqueous ionic liquid media for sustainable packaging of horseradish peroxidase under biotic stress
Source: Royal Society of Chemistry journal article supplement (doi:10.1039/d4cc05803h), 2024-12-23
Supplement: d4cc05803h1.pdf [file d4cc05803h1.pdf]

## Electronic Supplementary Information

### Bioinspired design of DNA in aqueous ionic liquid media for sustainable packaging of horseradish peroxidase under biotic stress

Diksha Dhiman,<sup>a,†</sup> Aaftaab Sethi,<sup>b,†</sup> Rakesh Sinha,<sup>a</sup> Sagar Biswas,<sup>a</sup> Gregory Franklin,<sup>a</sup> and Dibyendu Mondal<sup>\*a,c</sup>

---

<sup>a</sup>*Institute of Plant Genetics (IPG), Polish Academy of Sciences, Strzeszyńska 34, 60-479 Poznań, Poland.*

<sup>b</sup>*Laboratory of Biomolecular Interactions and Transport, Department of Gene Expression, Institute of Molecular Biology and Biotechnology, Faculty of Biology, Adam Mickiewicz University, Uniwersytetu Poznańskiego 6, Poznań 61-614, Poland.*

<sup>c</sup>*Centre for Nano and Material Sciences, Jain (Deemed-to-be University), Jain Global Campus, Kanakapura, Bangalore, Karnataka 562112, India.*

<sup>†</sup>*Equal contribution.*

Email: DM: [m.dibyendu@jainuniversity.ac.in](mailto:m.dibyendu@jainuniversity.ac.in); [dmon@igr.poznan.pl](mailto:dmon@igr.poznan.pl)

#### 1. Materials

Peroxidase from horseradish (HRP), trypsin from porcine pancreas, deoxyribonucleic acid (DNA), sodium salt, salmon testes, choline bicarbonate (80 wt% in water), phosphonoacetic acid, hydrogen peroxide, 2,2'-Azino-bis(3-ethylbenzothiazoline-6-sulfonic acid) diammonium salt (ABTS), sodium phosphate monobasic monohydrate and sodium phosphate dibasic were purchased from Merck. Ultrapure Milli-Q water was used for preparing assay solutions.

#### 2. Synthesis of Ionic Liquid (IL)

Choline phosphonoacetic acid ([Cho]<sub>2</sub>[PAA]; 2:1) was synthesized following a standard protocol through a simple acid-base reaction.<sup>1</sup> Phosphonoacetic acid was added slowly in portion to choline bicarbonate with continuous stirring at 75 °C. The reaction mixture was kept stirring for 12 h. The ILs was dried in rotavapor as well as under reduced pressure using a vacuum line. ILs with 3±1 wt% of water were then collected and stored in air tight vessel inside a desiccator for further use to study the enzymatic reaction. The pH of synthesized [Cho]<sub>2</sub>[PAA] (50%) was found out to be 5.5±0.2. The structure of the IL is shown in Figure S1.

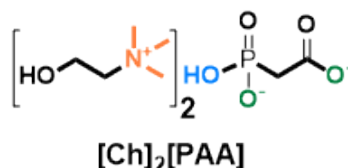

**Figure S1.** Chemical structure of the IL used in the present study.

### 3. Enzymatic assays preparation and peroxidase activity of HRP

#### (a) Optimization of final concentration of IL, DNA, and IL+DNA

The concentration of HRP was quantified using Shimadzu UV-1900i spectrophotometer with a quartz cuvette of 1 cm path length. The extinction coefficient of HRP at 403 nm is  $1.0 \times 10^5 \text{ M}^{-1} \text{ cm}^{-1}$ . Further, to optimize the final concentration of formulations, the activity studies of HRP was conducted by combining, 10  $\mu\text{L}$  of 100 nM HRP, and 50  $\mu\text{L}$  of 40 mM ABTS solution to 930  $\mu\text{L}$  of phosphate buffer (100 mM, pH 7.4) and to all the IL solutions (0 to 20 wt%), DNA (0 to 0.75 mg/mL) and IL (0 to 20 wt %) + DNA (0.75 mg/mL), DNA ( 0 to 0.75 mg/mL) + IL (15 wt%) based formulations. The assay solution was incubated for 15 minutes at 37 °C before adding 10  $\mu\text{L}$  of 10 mM  $\text{H}_2\text{O}_2$ , and the reaction progress was monitored using UV-vis spectroscopy at 420 nm for 120 seconds. The enzymatic activities were calculated by observing the changes in absorbance at 420 nm using the spectrophotometer considering the final product  $\text{ABTS}^+$  ( $\epsilon_{420 \text{ nm}} = 3.6 \times 10^4 \text{ M}^{-1} \text{ cm}^{-1}$ ). Subsequently, the HRP activity was calculated from the following equation with the first 60 seconds duration.

$$\% \text{ Relative activity} = \frac{\text{Absorbance}(t = 60 \text{ sec}) - \text{Absorbance}(t = 0 \text{ sec}) \text{ in IL/DNA}}{\text{Absorbance}(t = 60 \text{ sec}) - \text{Absorbance}(t = 0 \text{ sec}) \text{ in buffer}} * 100$$

#### (b) Activity of HRP after trypsin digestion

To profile the activity of HRP in the presence of a biological denaturant, HRP was further incubated in the presence of 6  $\mu\text{M}$  of trypsin at 37°C for 24 h along with phosphate buffer (pH=7.4) and all optimized formulations (IL (15 wt%), DNA (0.75 mg/ mL) and IL(15 wt%)+ DNA(0.75 mg/mL)). For relative activity calculations, the activity of HRP in buffer incubated in the presence of trypsin at time 0 was taken as 100%, and the activity of other systems was calculated relative to that.

#### 4. Stability Studies of HRP in the presence of phosphate buffer (pH =7.4), IL, DNA and IL+DNA

The conformational and colloidal stability of HRP in the presence of IL, DNA and IL+ DNA was analyzed using UV-visible, circular dichroism (CD) spectroscopy and zeta potential.

The UV absorbance spectra of HRP (0.5 mg/mL) at 403 nm were recorded using a Shimadzu UV-1900i spectrophotometer using 1 nm resolution, utilizing matched quartz cuvettes with a 1 cm path length in the presence of phosphate buffer (pH=7.4), IL (15 wt %), DNA (0.75 mg/ mL) and IL(15 wt %)+DNA (0.75 mg/ mL). The average of three spectra after eliminating the relevant blank from the tentative spectrum was considered for analysis. Further, HRP was digested in trypsin (6  $\mu$ M) in the presence of all four optimized formulations for 24 h and the UV spectra of HRP was recorded.

CD spectrum of DNA, HRP and trypsin was recorded on Jasco-1500 spectrophotometer, equipped with a Peltier system for temperature control. The wavelength range taken was 190-350 nm. The response time of 1 s and 1 nm bandwidth was used with a scan speed 20 nm/min. The concentration of DNA taken was 0.75 mg/ mL in the presence of phosphate buffer and IL (15 wt %). Whereas, the HRP and trypsin concentration was 2 mg/mL in the presence of phosphate buffer (pH=7.4), IL (2 wt %), DNA (0.75 mg/mL) and IL (2 wt %) + DNA (0.75 mg/mL). The samples were equilibrated for 15 min. All spectra were procured after blank subtraction.

Zeta potential ( $\zeta$ ) studies were carried out using Anton Paar Litesizer 500 device in which prior to the analysis, the samplings were made similar to that of UV-Vis spectra.  $\zeta$  potential analysis was performed in the Omega cuvette Mat. No. 225288 and all the studies were recorded in the protein mode with 200 cycles of run.

#### 5. SDS-PAGE of HRP before and after trypsin digestion

HRP stability before and after digestion with trypsin in PBS and different solvent systems namely [Ch]<sub>2</sub>[Dhp] IL, DNA, and DNA+IL were investigated using denatured SDS-PAGE. HRP was individually dissolved in 15 wt% of IL, 0.75 mg/mL DNA, and IL+DNA, respectively and were incubated with trypsin for 24 h at 37 °C. HRP solutions before and after digestion with trypsin were added with 2x laemmli sample buffer was mixed with  $\beta$ -mercaptoethanol (50  $\mu$ L in 950  $\mu$ L 2x laemmli sample buffer) for denatured SDS PAGE. Prior addition of the sample to the sample well the samples were heated to 90 °C for 5 minutes for all the denatured SDS PAGE. After that 6  $\mu$ g of enzyme sample was added to the sample well of 12% (PolyAcrylamide Gel) precast Mini-Protein TGX gel. Subsequently, electrophoresis was conducted at 100 V for 4 h with 10x-tris-glycine/SDS buffer. Thereafter, it was stained with silver nitrate solution for 20

seconds to develop the electrophoretic bands. The bands were analyzed comparing with pre-stained protein ladder (PageRuler, Thermo Scientific).

## 6. Computational Study

The structures of horseradish peroxidase (HRP), Trypsin (TRY) and B-DNA were obtained from the Protein Data Bank (PDB) with the corresponding PDB IDs: 1HCH, 1SQ0 and 1BNA, respectively. The initial preparation of these structures involved the removal of water molecules and other heteroatoms. Hydrogen atoms were subsequently added using the Discovery Studio Visualizer,<sup>2</sup> to ensure proper geometry and charge distribution. To accurately model the protonation states of the HRP and TRY residues at the experimental pH of 5.5, the H++ server was employed.<sup>3,4</sup> This is crucial for achieving realistic docking simulations. HRP-DNA and HRP-TRY docking simulations were conducted using the HDock server.<sup>5</sup> For further validation of docked complexes, AlphaFold's structural predictions were employed.<sup>6</sup> The structure of the ionic liquid (IL) was initially drawn in ChemDraw.<sup>7</sup> It was then optimized and minimized using Maestro,<sup>8</sup> part of the Schrödinger Suite, to ensure a conformation suitable for docking. The docking of the IL with the DNA, protein and HRP/DNA complex was performed using the SwissDock.<sup>9,10</sup> For DNA-IL docking: the box size was set to 40, 40, 40 and the box center to 15.0, 21, 9.0. For IL-HRP docking: the box size was set to 30, 30, 30 and the box center to -2.0, -2.0, 7.0. For IL-HRP/DNA complex docking: the box size was set to 40, 37, 33 and the box center to -9.0, -2.0, 1.0. The analysis of the docked complexes was carried out using PyMOL.<sup>11</sup>

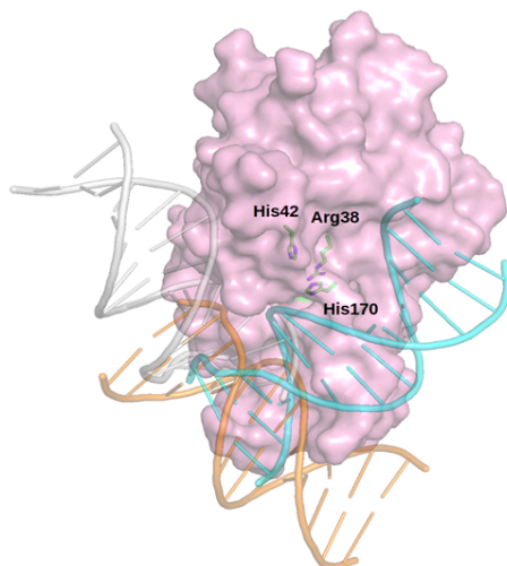

**Figure S2.** HRP-DNA complex highlighting three distinct DNA conformations from the top 10 docked models. HRP is shown in magenta, while the DNA conformations are represented as orange (top pose), gray (second-best pose), and cyan (third-best pose). These conformations, although distinct, bind around the HRP catalytic site without obstructing it. Catalytic residues are highlighted as green sticks and labelled.

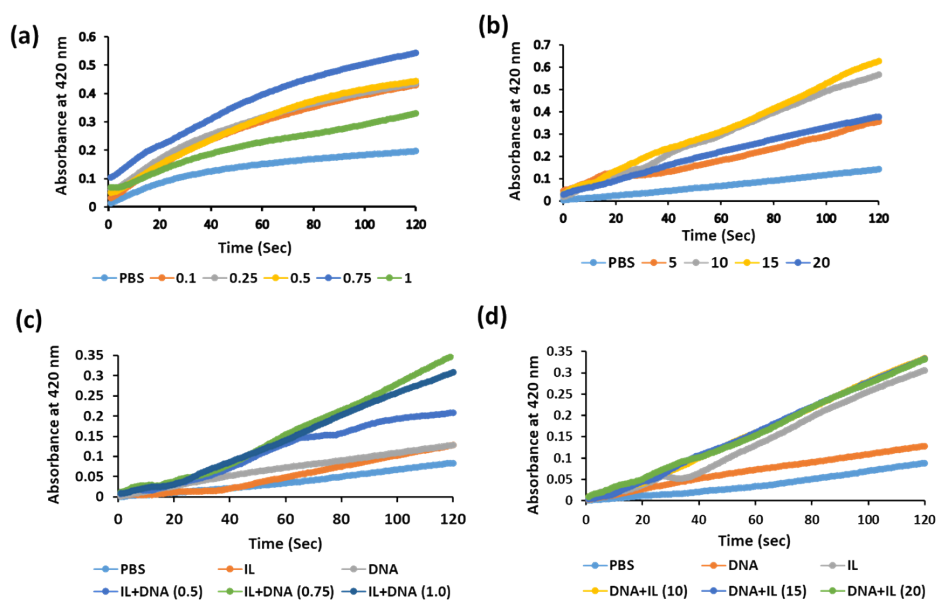

**Figure S3.** (a-b) Absorbance vs. time plot of HRP activity assay in presence of various concentration of DNA (a), different concentration of  $[Ch]_2[PAA]$  IL (b), at various concentration of DNA with fixed IL concentration (15 wt%) (c), and at various concentration of IL and fixed DNA concentration (0.75 mg/mL) (d).

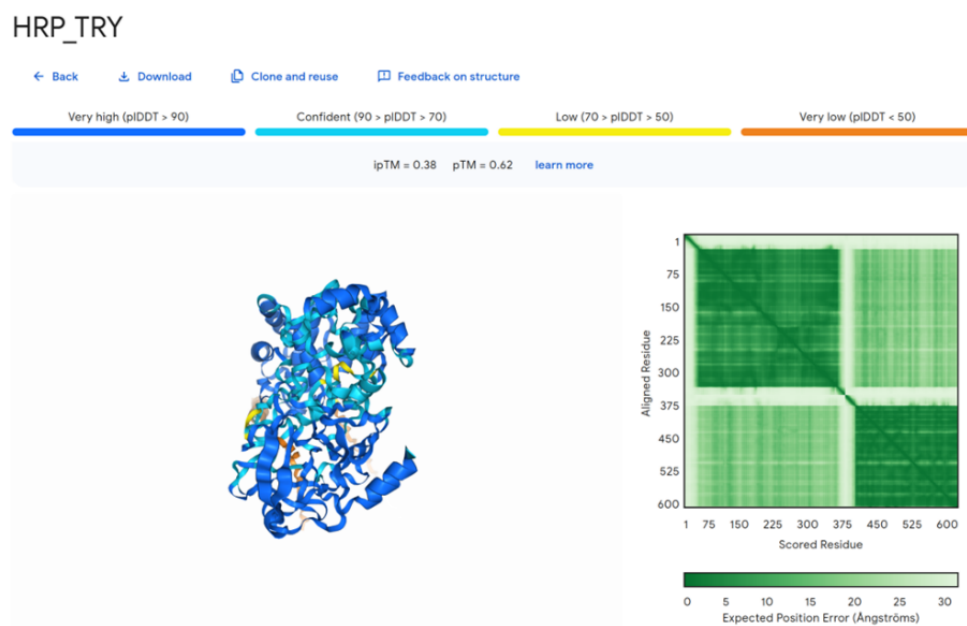

**Figure S4.** AlphaFold-predicted structure of the HRP-TRY complex with an ipTM score of 0.38, indicating very low reliability in predicted relative positions of the sub-units. Thus, these results were not considered for analysis.

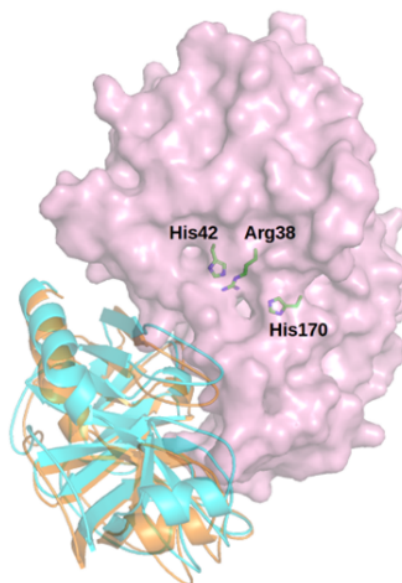

**Figure S5.** Validation of the HRP-TRY complex docking results. HRP is depicted in magenta, with catalytic residues shown as green sticks. The top pose generated by GRAMM<sup>12</sup> (orange), is in agreement with the corresponding pose from HDock (cyan). For clarity and presentation purposes, the loops have been smoothed in PyMOL.

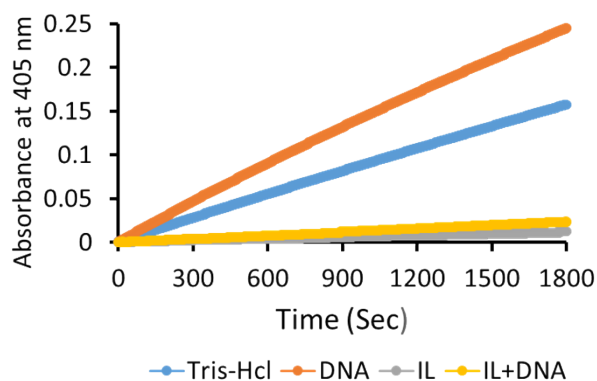

**Figure S6.** Activity of trypsin in presence of different solvent systems using N- $\alpha$ -benzoyl-DL-arginine 4-nitroanilide as substrate.

Activity of trypsin: We investigated the effect of IL/DNA-based formulations on the activity of Try. A mixture of N- $\alpha$ -benzoyl-DL-arginine 4-nitroanilide (BAPNA, 1 mM) and Try (0.5  $\mu$ M) was prepared at 37  $^{\circ}$ C in Tris-HCl buffer (50 mM, pH 7.8) containing CaCl<sub>2</sub> (10 mM).<sup>13</sup> The activity was studied under different conditions: in the presence of Tris-HCl alone, and in the presence of our studied systems—IL, DNA, and IL+DNA. The reaction progress was monitored using UV-vis spectroscopy at 405 nm over a duration of 1800 seconds.

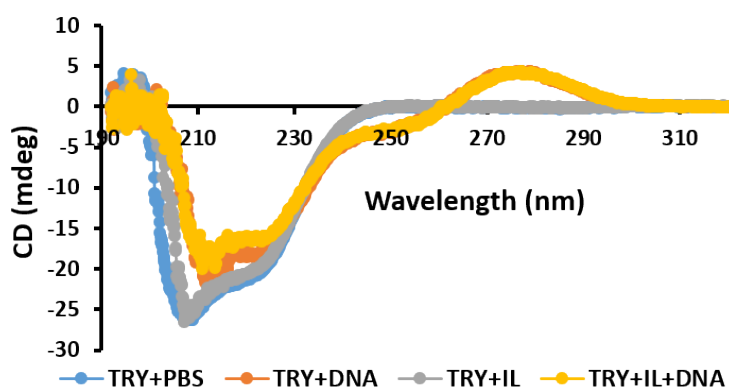

**Figure S7.** CD spectra of trypsin in the presence of different solvent systems.

## References

1. C. Mukesh, D. Mondal, M. Sharma and K. Prasad, Rapid dissolution of DNA in a novel bio-based ionic liquid with long-term structural and chemical stability: successful recycling of the ionic liquid for reuse in the process. *Chem. Commun.*, 2013, 49, 6849–6851
2. *Discovery Studio*. Dassault Systèmes. <https://www.3ds.com/products/biovia/discovery-studio> (accessed 2024-08-25).

3. Anandakrishnan, R.; Aguilar, B.; Onufriev, A. V. H++ 3.0: Automating pK Prediction and the Preparation of Biomolecular Structures for Atomistic Molecular Modeling and Simulations. *Nucleic Acids Research* **2012**, *40* (W1), W537–W541. <https://doi.org/10.1093/nar/gks375>.
4. Gordon, J. C.; Myers, J. B.; Folta, T.; Shoja, V.; Heath, L. S.; Onufriev, A. H++: A Server for Estimating pKa's and Adding Missing Hydrogens to Macromolecules. *Nucleic Acids Research* **2005**, *33* (suppl\_2), W368–W371. <https://doi.org/10.1093/nar/gki464>.
5. Yan, Y.; Tao, H.; He, J.; Huang, S.-Y. The HDock Server for Integrated Protein–Protein Docking. *Nat Protoc* **2020**, *15* (5), 1829–1852. <https://doi.org/10.1038/s41596-020-0312-x>.
6. Abramson, J.; Adler, J.; Dunger, J.; Evans, R.; Green, T.; Pritzel, A.; Ronneberger, O.; Willmore, L.; Ballard, A. J.; Bambrick, J.; Bodenstein, S. W.; Evans, D. A.; Hung, C.-C.; O'Neill, M.; Reiman, D.; Tunyasuvunakool, K.; Wu, Z.; Žemgulytė, A.; Arvaniti, E.; Beattie, C.; Bertolli, O.; Bridgland, A.; Cherepanov, A.; Congreve, M.; Cowen-Rivers, A. I.; Cowie, A.; Figurnov, M.; Fuchs, F. B.; Gladman, H.; Jain, R.; Khan, Y. A.; Low, C. M. R.; Perlin, K.; Potapenko, A.; Savy, P.; Singh, S.; Stecula, A.; Thillaisundaram, A.; Tong, C.; Yakneen, S.; Zhong, E. D.; Zielinski, M.; Židek, A.; Bapst, V.; Kohli, P.; Jaderberg, M.; Hassabis, D.; Jumper, J. M. Accurate Structure Prediction of Biomolecular Interactions with AlphaFold 3. *Nature* **2024**, *630* (8016), 493–500. <https://doi.org/10.1038/s41586-024-07487-w>.
7. ChemDraw/Revvity Signals Software. <https://revvitysignals.com/products/research/chemdraw> (accessed 2024-08-25).
8. Maestro. Schrödinger. <https://www.schrodinger.com/platform/products/maestro/> (accessed 2024-08-25).
9. Grosdidier, A.; Zoete, V.; Michielin, O. SwissDock, a Protein-Small Molecule Docking Web Service Based on EADock DSS. *Nucleic Acids Research* **2011**, *39* (suppl\_2), W270–W277. <https://doi.org/10.1093/nar/gkr366>.
10. Bugnon, M.; Röhrig, U. F.; Goullieux, M.; Perez, M. A. S.; Daina, A.; Michielin, O.; Zoete, V. SwissDock 2024: Major Enhancements for Small-Molecule Docking with Attracting Cavities and AutoDock Vina. *Nucleic Acids Research* **2024**, *52* (W1), W324–W332. <https://doi.org/10.1093/nar/gkae300>.
11. PyMOL | pymol.org. <https://www.pymol.org/> (accessed 2024-08-24).
12. Singh, A., Copeland, M.M., Kundrotas, P.J., Vakser, I.A. GRAMM Web Server for Protein Docking. In: Gore, M., Jagtap, U.B. (eds) Computational Drug Discovery and Design. Methods in Molecular Biology 2024, 2714. Humana, New York, NY. [https://doi.org/10.1007/978-1-0716-3441-7\\_5](https://doi.org/10.1007/978-1-0716-3441-7_5)
13. K. Okuro, M. Sasaki, T. Aida. *J. Am. Chem. Soc.* 2016, **138**, , 5527–5530. <https://doi.org/10.1021/jacs.6b02664>
